1 **Who is researching biodiversity hotspots in Eastern Europe? A case study on grasslands**  
2 **from Romania**

3 Andreea Nita<sup>1\*</sup>, Tibor Hartel<sup>1,2</sup>, Steluta Manolache<sup>1</sup>, Cristiana M. Ciocanea<sup>1</sup>, Iulia V. Miu<sup>1</sup>,  
4 Laurentiu Rozylowicz<sup>1</sup>

5 University of Bucharest, Center for Environmental Research and Impact Studies, 1 N. Balcescu, 010041, Bucharest,  
6 Romania

7 Department of Biology and Ecology in Hungarian, Babes-Bolyai University, Cluj-Napoca, Romania

8 andreea.nita@cc.unibuc.ro

9 **Abstract**

10 Farming landscapes of Europe are vital arenas for social-ecological sustainability because of  
11 their significant coverage and potential to integrate food production with biodiversity  
12 conservation. Knowledge gathered by scientific research is a critical ingredient for developing  
13 and implementing socio-economically and ecologically sustainable grassland management  
14 strategies for grasslands. The quality of scientific knowledge and its potential to address  
15 grasslands as complex social-ecological systems is strongly dependent on the creativity and  
16 scientific ambition of the researcher, but also on the network (from academic and non-academic  
17 sectors) around the researcher. The goal of this paper is to map the research network around  
18 Romania's grasslands. These systems have exceptional socio-cultural and economic values and  
19 are between the most biodiverse ecosystems of the world. Considering the multiple threats to  
20 these grasslands, it is an urgent need to understand the existing scientific knowledge profile  
21 around these systems. This paper aims at using bibliometrics analysis, a well-developed  
22 scientific domain that envisages network theory to analyze relationships between affiliations  
23 network, co-authorship network, and co-word analysis. The number of studies targeting  
24 grassland management in Romania is increasing mainly thanks to international involvement.  
25 However, the management of the grasslands is still deficient and the contribution of science to  
26 the process is virtually absent. The subject of research is mainly related to the biological and  
27 ecological characteristics of grasslands, a notable absence from internationally visible research  
28 being the management of grasslands, especially in the context of EU Common Agricultural  
29 Policies. To increase scientific performance, and better inform EU and local policies on  
30 grassland management, Romanian researchers should better capitalize on international  
31 collaborations and local academic leaders. Our findings can be used to identify research gaps and

32 to improve collaboration and knowledge exchange between practitioners, scientists, policy  
33 makers, and stakeholders.

#### 34 **Keywords**

35 affiliations network; co-occurrence keyword network; co-authorship network; grasslands  
36 specialists; bibliometrics analysis

#### 37 **Introduction**

38 The integration of agricultural production, biodiversity conservation, and socio-cultural values is  
39 a key challenge for the sustainability of social-ecological systems (Fischer et al. 2012). Current  
40 grasslands of Europe developed under millennia-long human management, typically by livestock  
41 grazing and hay production. Grasslands have a substantial contribution to the high nature value  
42 farmlands of the European Union (Veen et al. 2009, Plieninger and Bieling 2013, Lomba et al.  
43 2014). Several protected species and habitats are linked to grasslands and are dependent on some  
44 form of extensive, multifunctional management of these ecosystems (Halada et al. 2011,  
45 Dorresteijn et al. 2017). Furthermore, wooded meadows and wood-pastures are considered as an  
46 archetypical manifestation of HNV farmlands in Europe (Plieninger et al. 2015).

47 Many EU countries already lost culturally and naturally important grasslands due to changes in  
48 management practices (Pe'er et al. 2014). The intensive, highly specialized management of the  
49 grasslands resulted in the sharp decrease in their biodiversity, aesthetic and cultural values or  
50 even the disappearance of the grasslands. On the other hand, land abandonment also threatens  
51 several species and habitats (however also creating opportunities for conserving others) as well  
52 as ecosystem services of grasslands, commonly through woody vegetation encroachment (Stoate  
53 et al. 2009, Bugalho et al. 2011, Queiroz et al. 2014, Michielsen et al. 2017).

54 Knowledge is essential for a socioeconomically and ecologically sustainable grassland  
55 management (Fischer et al. 2012). In one hand, scientific knowledge can generate a contextual  
56 understanding of the relationship between the management intensity and the biodiversity and  
57 productivity of the grasslands (Kleijn et al. 2009). On the other hand, scientific research is  
58 important in developing new types of conceptualizations of the grasslands, for example as  
59 complex, adaptive systems which can exist in multiple social-ecological states (Sutcliffe et al.  
60 2014, Hartel et al. 2018). Nevertheless, scientific knowledge can contribute to re-addressing

61 current management paradigms around the management of production landscapes (Abson et al.  
62 2017), including grasslands. Since grasslands can simultaneously fulfill multiple social-  
63 ecological values and roles (e.g., production, biodiversity conservation, recreational and cultural  
64 values), an overly narrow (e.g., disciplinary) scientific approach for understanding them could  
65 promote simplistic management measures which often lack socio-cultural contextualization. The  
66 quality of scientific knowledge and its potential to address grasslands as complex social-  
67 ecological systems is strongly dependent on the creativity and scientific ambition of the  
68 researcher, but also on the social network (from academic and non-academic sectors) around the  
69 researcher (Lescourret et al. 2015).

70 In this study, we address the collaboration network between the academics and the diversity of  
71 research domains around the Romanian grasslands. The importance of our research is fourfold.  
72 First, Romanian grasslands are between the best biodiversity hotspots at the global level (Wilson  
73 et al. 2012), with several ancient land-use forms such as wood-pastures (Cremene et al. 2005,  
74 Plieninger et al. 2015), traditional stewardship and management forms (Babai and Molnár 2014).  
75 These grasslands are under threat from overgrazing, changes in management and stewardship  
76 and abandonment (Baur et al. 2006, Ruprecht 2006, Sutcliffe et al. 2014, Peringer et al. 2017).  
77 Second, Romania is a developing country in Eastern Europe, where research is suffering from  
78 lack of funds, institutional instability and intense political pressure (David and Marko 2018,  
79 Miclaus and Micu 2018). This overall harsh conjuncture for research is hampering the  
80 production of holistic knowledge (Hanspach et al. 2014) and innovation which will be  
81 indispensable for Romania in order to navigate challenges of globalization, including its  
82 increasing role in the global food security (Benton et al. 2011), coping with extreme climate  
83 variations (Azadi et al. 2018) and land grabbing (Petrescu-Mag et al. 2017). Third, the academic  
84 world in Romania is still transitioning from a local/regional, disciplinary thinking and  
85 approaches towards adopting international standards of scientific rigor and holistic, inter- and  
86 transdisciplinary approaches. Because of this, Romania is sharply underrepresented in the  
87 international scientific databases while publishing in local journals (i.e., hosted by the academic  
88 institutions) is still actively promoted by academic institutions. Fourth, management of  
89 grasslands in Romania is still deficient (Pătru-Stupariu et al. 2017) despite the latest legal  
90 motions, which most often do not consider the contribution of science to the process.

91 Collaboration between academics and knowledge creation have been extensively studied using  
92 network analysis framework. Analyses span from understanding of patterns of scientific  
93 collaboration as resulted from co-authorship and institutional networks (Newman 2004, Hancean  
94 et al. 2014, Hancean and Perc 2016) to knowledge creation (Wang 2016), to prediction of  
95 productivity (Barabási et al. 2002) or trends (Chen et al. 2010). In this paper we use network  
96 analysis, to characterize the status of scientific research in the field of grassland governance in  
97 Romania and suggests ways to improve scientific performance by: 1) revealing internationally  
98 visible research around Romania's grasslands published after 1990; 2) highlighting most  
99 important institutions generating the research, and mapping the invisible authors and academic  
100 leaders as resulted from the co-authorship network, and 3) analyzing the co-occurrence keyword  
101 network to discover the most common keywords, research topics, and scientific interest.

## 102 **Methods**

103 To identify the research related to grasslands in Romania, we extracted from the Scopus database  
104 (Elsevier B.V.) 602 articles, book chapters, and conference proceedings potentially related to the  
105 investigated subject. We obtained these publications by searching simultaneously abstracts,  
106 titles, and keywords sections with the following keywords: *Common Agricultural Policy*, *CAP*,  
107 *pasture*, *grassland*, *meadow*, *lawn*, *greensward*, *grazing*, *graze*, *silvopastoral*, *pastureland*,  
108 *rangeland*, *mowing* (and adding *Romania* to each of them, e.g., “pasture” AND “Romania”).  
109 Then, we went through each of these publications and removed those who do not contain  
110 information about the subject of our review (e.g., paleoecology, paleobotany) and published  
111 before 1990. In this way, we obtained a final database that includes 197 publications relevant to  
112 the grasslands of Romania (Figure 1). For each article, we extracted the list of keywords, authors  
113 and their affiliations as stated in the papers. Figure 1 shows an ascending trend in the number of  
114 publications, which can be interpreted as an indicator of increasing interest of scientific  
115 researchers on grasslands from Romania

116 The scientific articles targeting Romanian grasslands were published in 107 journals and  
117 proceedings. Top journals in our network, with more than 5 publications are: *Quality-Access to*  
118 *Success* (15 publications), *International Multidisciplinary Scientific GeoConference Surveying*  
119 *Geology and Mining Ecology Management (SGEM)* (14), *Notulae Botanicae Horti Agrobotanici*  
120 *Cluj-Napoca* (8), *PLoS ONE* (6), *Applied Vegetation Science* (5), *Biodiversity and Conservation*

121 (5), *Environmental Engineering and Management Journal* (5), and *North-Western Journal of*  
122 *Zoology* (5).

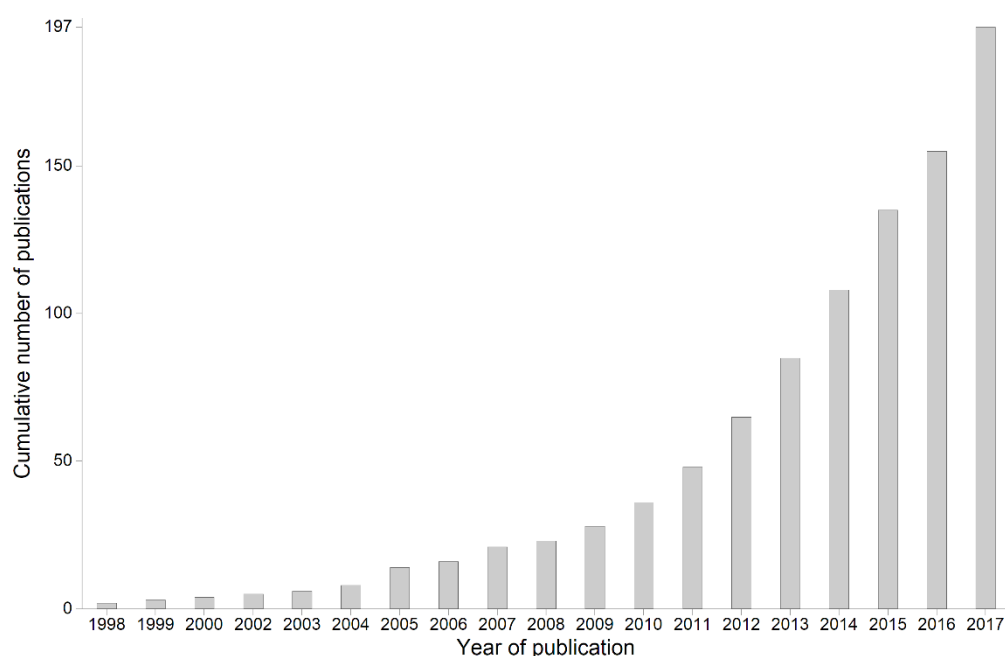

123

124 *Figure 1 – Cumulative number of publications targeting Romania's grasslands accessible on the Scopus database (1998-2017).*

125 For the bibliometric analysis, we constructed three network matrices: (i) an affiliations network,  
126 to infer about inter-institutional cooperation; (ii) a co-authorship network, which highlight  
127 invisible authors and academic leaders, and (iii) and a co-occurrence keyword network to  
128 discover hidden connections between the most common keywords, research topics and scientific  
129 interest. For these analyses, we created distinct databases which we then cleaned and unified  
130 (i.e., standardize the name of institutions, authors, and keywords to avoid duplication of entries  
131 due to different spelling). The cleaned matrices include 192 unique affiliations (516 entries  
132 initially), 517 unique authors (755 entries initially) and 577 unique keywords (1019 entries  
133 initially). The methodology workflow is presented in Figure 2.

134 *(i) Affiliations analysis*

135 We used *bi-component analysis* to identify blocks (bi-connected subnetworks) and the cut-points  
136 (articulation points) in the affiliation graph (Hanneman and Riddle 2005). If removed, cut point  
137 institutions break the affiliation network into one or more bi-connected subnetworks  
138 (Leydesdorff 2004). Such institutions are important for cohesivity of research network focused  
139 on Romanian pastures and might act as research brokers among otherwise disconnected groups

140 (Borgatti et al. 2018). An affiliation subgraph is bi-connected if every institution in the subgraph  
141 (minimum three) has direct connections to other and even removing any node, the subgraph  
142 remains connected (Hanneman and Riddle 2005). The number and size of blocks is an indication  
143 of network fragmentation. If a network is dominated by one block, then most institutions  
144 cooperate during the research. Smaller blocks include isolated institutions, which published a  
145 small number of papers on the subject or on uncommon topics (Leydesdorff 2004).

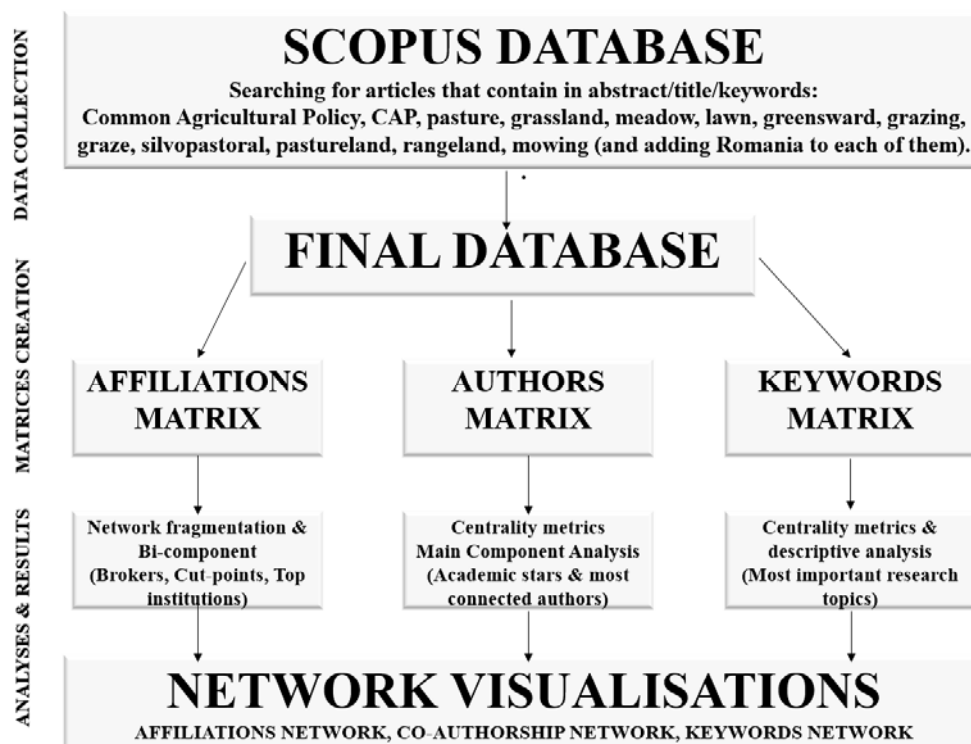

146

147 *Figure 2 - Workflow of network analyses of internationally visible research related to grasslands of Romania.*

148 We also calculated several node-level centrality metrics: degree, betweenness, and eigenvector.  
149 *Degree centrality* of an institution represents the number of direct connections (Abbasi et al.  
150 2012, Borgatti et al. 2018). The metric identifies the most collaborative institutions, i.e., the  
151 institutions with the highest number of connections to other research units in Romanian  
152 grassland research. The metric does not account for how important the institutions are linked to  
153 the node of interest. Thus, an institution can be considered as collaborative even if it is linked  
154 only to institutions that have no other collaborations in the network. *Eigenvector centrality* is  
155 similar to degree centrality but scores higher connections with institutions which are themselves  
156 well connected (Borgatti et al. 2018). It represents the sum of the eigenvectors of the institutions

157 that the institution of interest is connected to, and reveal the best options for future partnerships  
158 (most influent institutions, which can further promote partnership in research) (Borgatti et al.  
159 2018). *Betweenness centrality* measures the extent to which an institution lies on paths  
160 between other institutions from the research network. Such institutions can control the flow of  
161 information in the network if we assume that every pair of connected institutions exchanges  
162 information with equal probability and information flow on a short path chosen at random  
163 (Barabási 2016). Such institutions can be seen as bridge affiliations, e.g., can control the research  
164 subjects in a partnership (Leydesdorff 2004). Relationships among countries and within  
165 countries, resulted from affiliations declared by the authors, were represented using a chord  
166 diagram (Flor 2018).

#### 167 (ii) *Authors analysis*

168 We use authors' matrix to analyze the co-authorship network created around Romanian grassland  
169 research and to illustrate the patterns of cooperation between the scientists in this research  
170 domain (Barabási et al. 2002, Ding et al. 2014). We calculated the *network fragmentation* metric,  
171 which in our case indicates the proportion of pairs of authors that cannot reach each other  
172 (Borgatti et al. 2018). Large datasets, as it is the case of our database, typically involve many  
173 small independent clusters around larger ones and one large and dense cluster (Hancean and Perc  
174 2016). Thus, we assessed the distribution of components in the co-authorship network and  
175 extracted the largest connected component (main component) that shows the group of highly  
176 active authors focused on grasslands at the national level (subnetworks of authors that are  
177 maximally connected between each other). We also, calculated the *degree centrality* in order to  
178 find out which are the most collaborative authors within the network, and compared the results  
179 with the *betweenness centrality* to highlight the “academic stars” within the network – authors  
180 with high degree and betweenness centralities (Glänzel and Schubert 2004, Ding et al. 2014).

181 To better understand the motivations for scientific collaboration the Romanian grassland  
182 research, three authors with key positions in the research network were asked to respond to an  
183 interview on the opportunities and constraints of research in this domain. A network leader  
184 affiliated to a Romanian institution (*network leader a*), a foreign author continuing scientific  
185 work in Romania (*network leader b*), and a foreign author who works abroad (*network leader c*),

#### 186 (iii) *Keywords network*

187 Analyses based on keywords have been applied in various techniques such as text mining, data  
188 reduction and clustering (Cobo et al. 2011, Ding et al. 2014, Popescu et al. 2014) to identify  
189 emerging research. Keywords are also good representatives for the main topics addressed by  
190 research in general (Dotsika and Watkins 2017), and co-occurrence *keywords network* analysis  
191 can be used to highlight the most common and important research keywords (Ding et al. 2014).  
192 Hence, to infer about most common, popular, and bridge keywords featured in Romanian  
193 grasslands research, we used the degree, eigenvector, and betweenness centralities (see  
194 affiliations networks for details about these network-level metrics).

195 Network analyses were performed in UCINET software (Borgatti et al. 2002), and the networks  
196 were graphically represented using Netdraw (Borgatti 2002), and *chorddiag* R package (Flor  
197 2018).

## 198 **Results**

### 199 *Affiliations network*

200 The network of organizations hosting researchers publishing about grasslands from Romania  
201 includes 192 distinct institutions from 36 countries out of which 14 are isolated institutions (i.e.  
202 only collaborates inside their institution). Nine of the isolated affiliations are from foreign  
203 countries (Japan, Poland, Italy, Spain, Germany, Switzerland, Ukraine), but there are also 5  
204 isolated institutions from Romania: Politehnica University of Timisoara, University of Pitesti,  
205 Technical University of Cluj-Napoca, University Bogdan Voda, and Danube Delta National  
206 Institute for Research and Development. The best-represented affiliations involved in Romanian  
207 grassland research are from Romania (53), Germany (23), United Kingdom (13) and Hungary  
208 (13).

209 Researchers from Romanian institutions collaborate mostly with researchers from Romania (138  
210 institutional collaborations), Germany (92), Hungary (29), Czech Republic (19), and UK (18).  
211 Also, the next best-represented country, Germany, collaborate mostly with institutions from  
212 Romania and Germany (Figure 3).



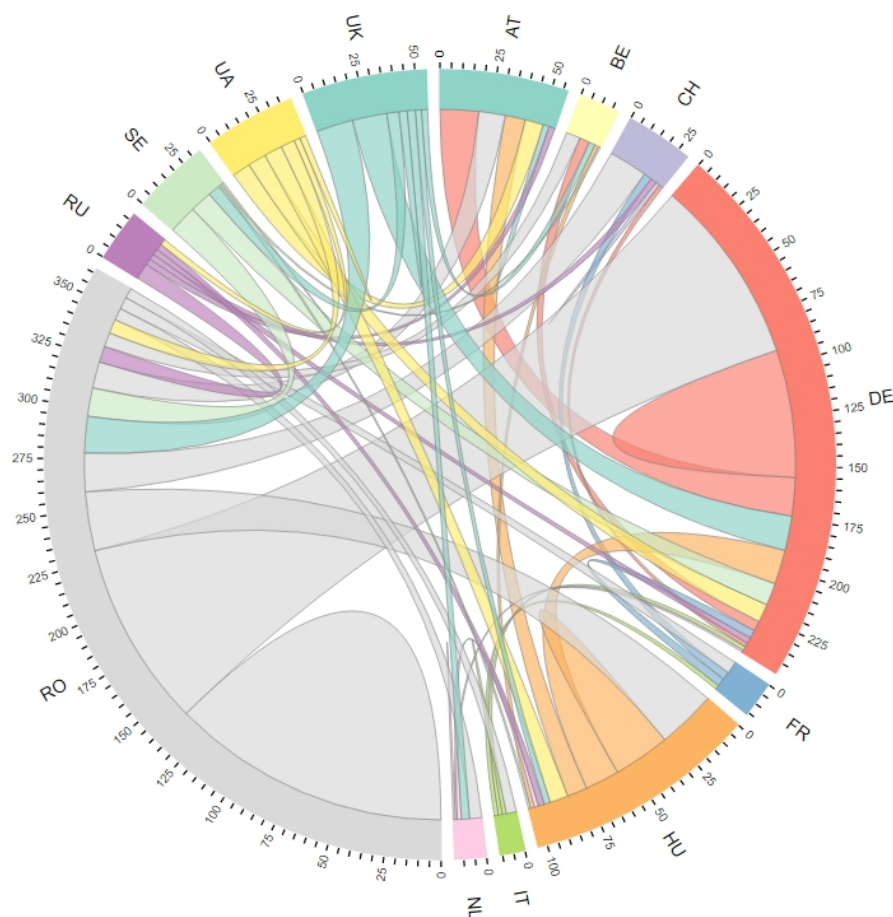

213

214 *Figure 3 – Chord diagram showing international and national collaborative pattern as resulted from internationally visible*  
215 *publications related to grasslands in Romania (links = co-occurring countries in an article; only countries with > 10 collaborations*  
216 *with institutions from Romania are shown).*

217 The Bi-components analysis generated 45 blocks (Supplementary Table 1) held by 25 cut  
218 points/affiliation brokers (Figure 4), which if they were to be removed, the structure of the  
219 network would become divided into unconnected parts. Block 31 has the highest number of  
220 affiliations (101, out of which 20 are from Romania). Institutions acting as affiliation brokers are  
221 from Romania (16 institutions), Hungary (3), Slovenia (1), Czech Republic (1), Germany (2),  
222 Sweden (1) and Italy (1).

223 Figure 4 presents the affiliations ranked by their importance in terms of best position within the  
224 bibliometric network (betweenness centrality), influence (eigenvector centrality), and number  
225 of network connections relevant for Romanian grassland research (degree centrality). The *Babes-*  
226 *Bolyai University* (Romania) control the flow of information (betweenness), has the highest  
227 number of connections (degree), and is the most influential institution (eigenvector) within the

228 network (Supplementary Table 1). The *Romanian Academy* (Romania) also has the control over  
229 the entire network from the scientific cooperation point of view and occupies the second position  
230 in term of number of connections and influence (Figure 4 and 5) while on the 3<sup>rd</sup> position is the  
231 *Hungarian Academy of Sciences* (Hungary).

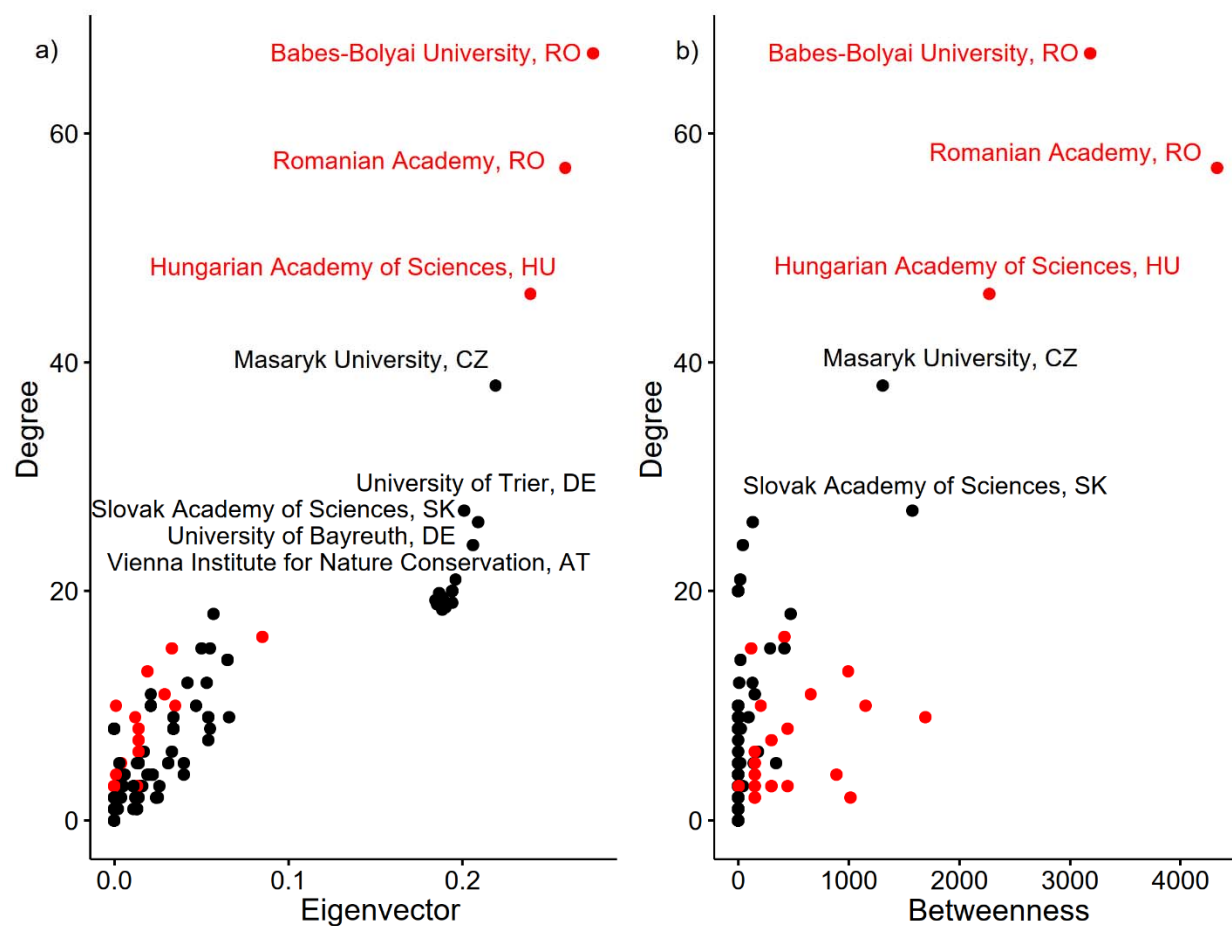

232

233 Figure 4 – Degree versus eigenvector (a) and betweenness (b) centralities of institution hosting researchers publishing about  
234 Romania's grasslands (cut points/affiliation brokers are in red).

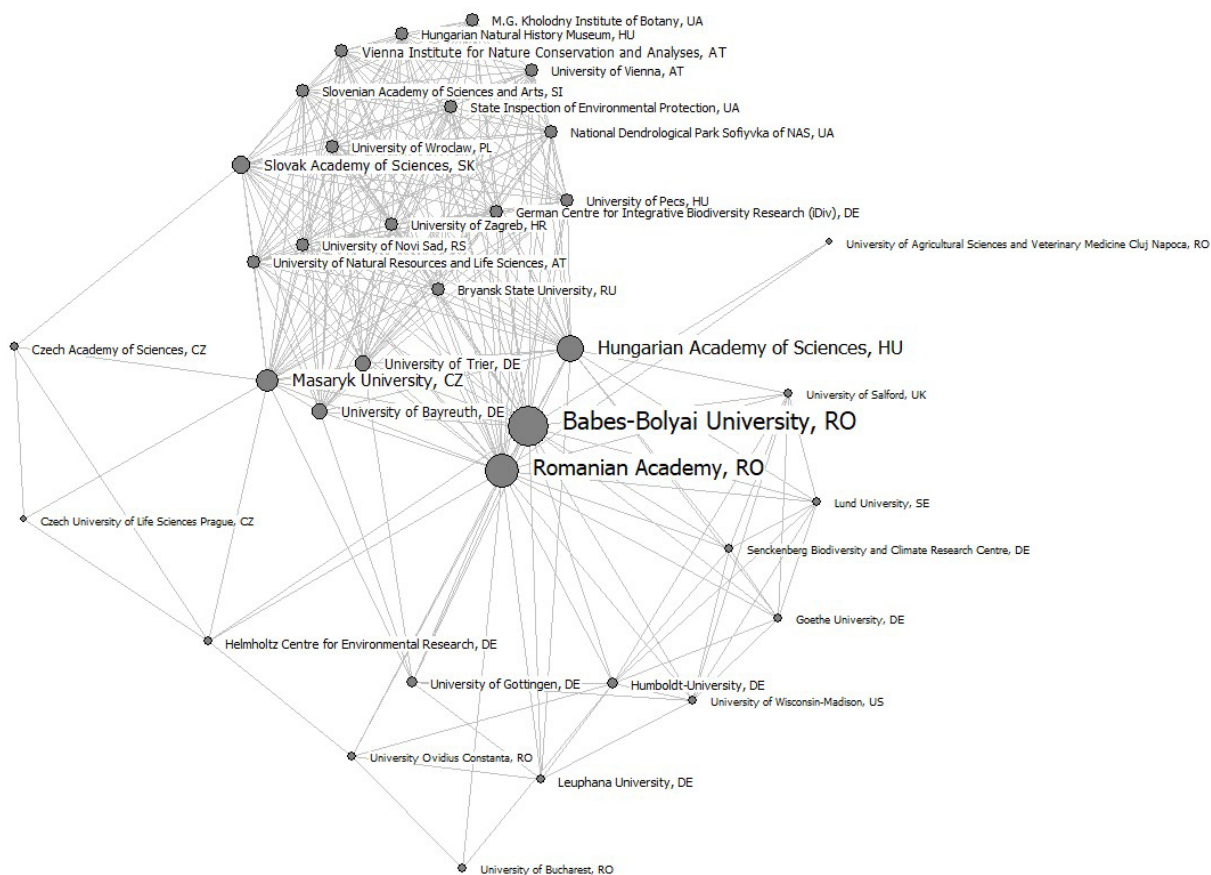

235

236 *Figure 5 – Network of the affiliations of authors publishing about Romania’s grasslands with a degree centrality >10 (size of*  
237 *nodes and labels given by degree).*

### 238 *Authors network*

239 The network of authors is composed of 517 authors and has a high fragmentation (0.886). The  
240 main component analysis divided the fragmented network into 92 clusters (Supplementary Table  
241 1). Cluster 6 is the densest component and sums up 168 authors (Figure 6), while the rest of the  
242 clusters have a mean of 3.83 authors (stdev = 3.97). Giving its importance, we further mapped  
243 Cluster 6 to have a closer look at its structure (Figure 6). Most of the authors forming part of the  
244 main component are not Romanians, hence, many important authors within the Romanian  
245 grassland research network are foreigners (Figure 7).

246

247

248

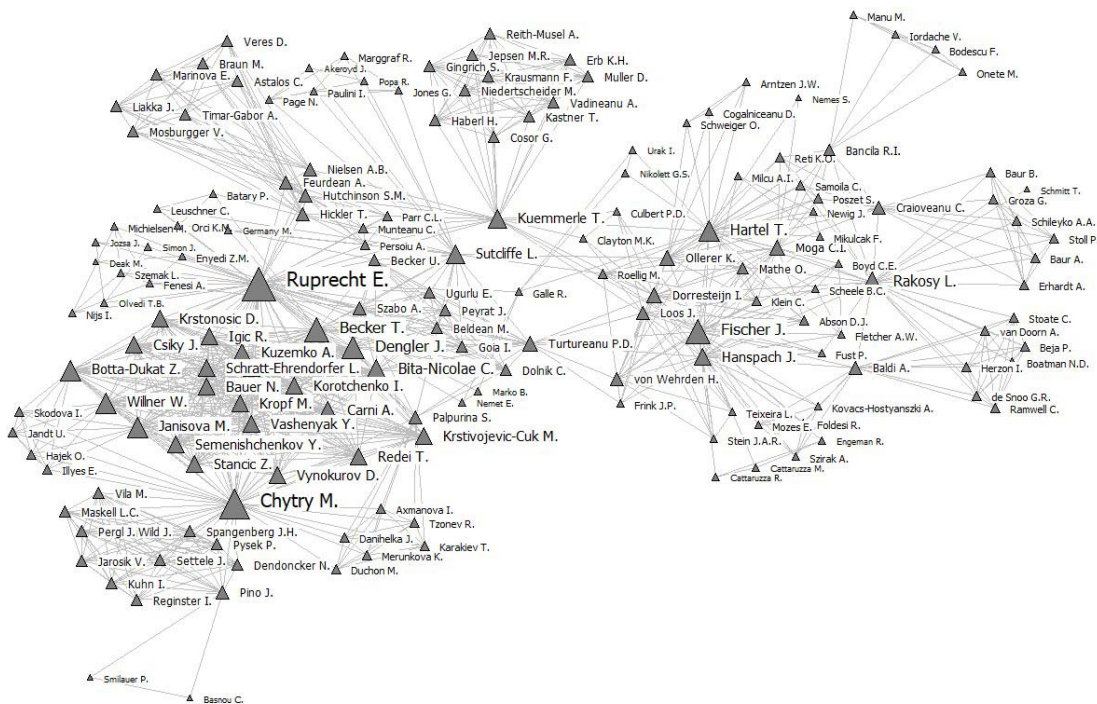

249

250 *Figure 6 – Main component of the network of authors publishing about Romania’s grasslands (size of nodes given by degree).*

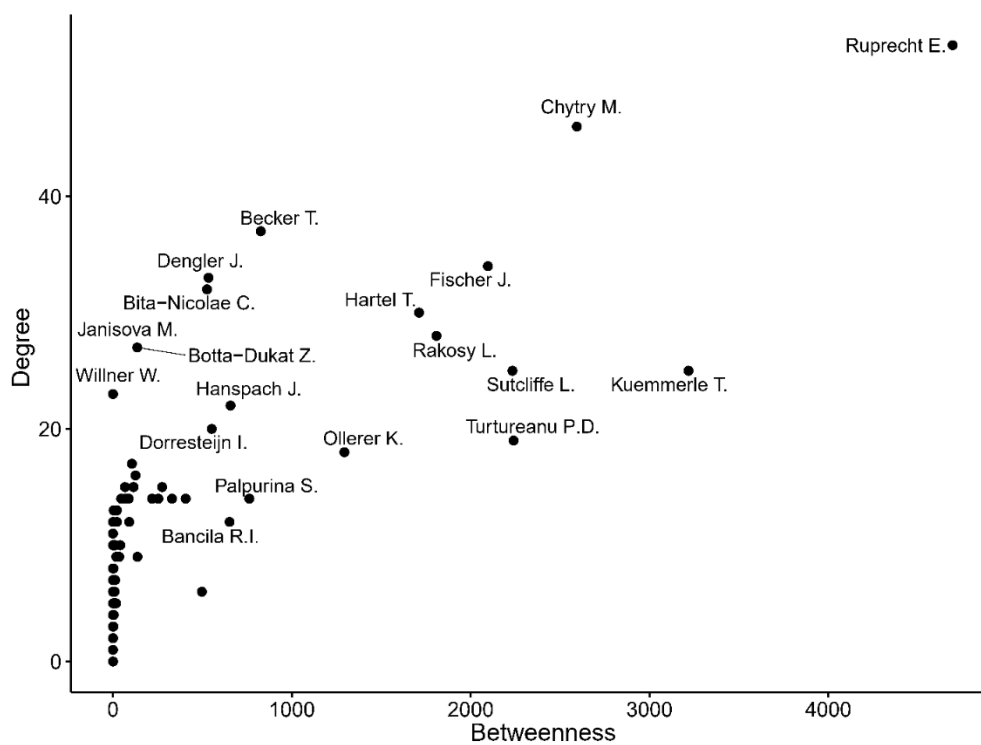

251

252 *Figure 7 - Top academic authors publishing about Romania’s grasslands in terms of number of connections (degree) and*  
 253 *position in the network (betweenness).*

254 Based on this result, we carried out a short interview with three network leaders in order to  
255 conclude how they have evolved in their professional career, who inspired them to research the  
256 grasslands of Romania and what is the key to their success in terms of national and international  
257 partnerships made in this field. The authors were anonymized as “*network leader a*” (NLa),  
258 “*network leader b*” (NLb), and “*network leader c*” (NLc).

259 The paragraph below summarizes the answers of interviewed network leaders for the following  
260 questions.

261 **Q1. Who inspired you to research grasslands in Romania (e.g., researchers, articles,  
262 institutions from Romania or foreign).**

263 **NLa:** *After finishing my studies at the Babeş-Bolyai University from Cluj-Napoca, Romania, I  
264 have met a Romanian grassland researcher with a great expertise and a passion for rare plants  
265 of steppe habitats. Field trips to beautiful steppe-like grasslands and the concern about their  
266 transformation or loss inspired me to study grasslands. Later on, my Ph.D. supervisor, especially  
267 his way of thinking about diversity, inspired me a lot, thus I have worked with him and some of  
268 his colleagues for several years.*

269 **NLb:** *A friend was researching High Nature Value Farmland in Europe and told me about the  
270 species-rich grasslands in Transylvania that she had visited. I was curious, and with her  
271 assistance and the help of local partners, I was lucky enough to be able to do some fieldwork for  
272 a scientific study there.*

273 **NLc:** *It was in 1997 before I studied Biology when I first came to Transylvania. I stayed for a  
274 few days with some friends in a small village not far from Sighisoara. It was summer and one  
275 evening we climbed a hill behind the houses to watch the sunset. I don't remember the sunset, but  
276 I do remember the meadows we walked through. They were so amazing. Although I have grown  
277 up on a farm myself, I hadn't seen nor smelled nor heard such a meadow before. Every plant  
278 seemed to be blooming and every insect buzzing. It was such richness and beauty. That was the  
279 thing that made me most enthusiastic about grasslands in Transylvania, even if I only later  
280 learned to put scientific labels on that richness.*

281 **Q2. How did you form your co-authorship or partnership network? What were the main  
282 challenges and opportunities in this respect?**

283 **NLa:** *At the very beginning of my career, personal contacts have been the most important in*  
284 *finding mentors, since there was a limited access to scientific literature and even to the internet*  
285 *in my home country in the 1990s. These first mentors gave me opportunities to further develop*  
286 *my 'partnership network' by inviting me to their institutions abroad (in Hungary, where I had no*  
287 *language or cultural barriers) and to conferences, where I could meet other scientists. Later on,*  
288 *I have contacted scientists from abroad (outside of Hungary), whose papers raised my interest*  
289 *the most, by e-mail, and looked for scholarships for research stays at their host institutions.*  
290 *Nowadays, there are scientists from European institutions contacting me and asking me for*  
291 *collaboration within the framework of scientific projects.*

292 **NLb:** *The Romanian conservation NGO Foundation ADEPT generously hosted my work in*  
293 *Romania, and through them, I met many, many interesting people involved in all aspects of*  
294 *conservation (academic and non-academic). Perhaps the most difficult thing was to stay in touch*  
295 *with all of them!*

296 **NLc:** *My network developed through a social-ecological research project which included*  
297 *research on vascular plant diversity in the farming landscape of Southern Transylvania*  
298 *(Sighisoara). That means through multiple pathways including cooperation with local NGOs,*  
299 *scientists, field assistants, and friends. Opportunities clearly included to learn from knowledge*  
300 *and experiences from others and to join skills for getting fieldwork and analysis done. As a*  
301 *challenge, I see the language barrier and also that we didn't do a classic vegetation study but*  
302 *applied a random sampling design for putting survey sites (which didn't match with the more*  
303 *traditional vegetation research).*

304 **Q3. How would you describe the collaboration between Romanian grassland researchers?**

305 **NLa:** *There are few collaborations, and the majority is based on personal acquaintance.*  
306 *Confidence or convenience (people working at the same institution) have important roles in*  
307 *forming research teams around a certain project.*

308 **NLb:** *I only have experience of my own collaboration with Romanian grassland researchers,*  
309 *which was pleasant and productive.*

310 **NLc:** *To be honest, I don't feel I can say much about this. I don't have much insight into their*  
311 *collaboration. Also, I don't consider myself a grassland expert and therefore I am not so deep*  
312 *into this network.*

313 **Q4. How would you describe the role of foreign scientists in Romanian grassland research?**

314 **NLa:** *Foreign scientists find Romanian grasslands remarkable, and they come to work in*  
315 *Romania with very specific research questions. They often look for a local expert in Romanian*  
316 *grasslands to involve in their project, and by this means collaborations arise. I consider foreign*  
317 *scientists bring in many interesting research questions, achieve nice results and invigorate*  
318 *Romanian grassland research.*

319 **NLb:** *My impression is that scientists from northern and western Europe are very aware of the*  
320 *grassland diversity that has been lost in the more intensified regions of Europe. I think in any*  
321 *ecosystem there is always value in combining observations from local researchers who*  
322 *intimately know the area and can interpret its subtleties, and "outsiders" who can maybe bring a*  
323 *fresh perspective and spot parallels with other systems.*

324 **NLc:** *From my limited perspective they seem to have a strong influence or at least they seem to*  
325 *stand out for me. I could name a few foreign grassland researchers but would struggle to name*  
326 *the same number of Romanians. However, this is probably biased because I am a foreigner*  
327 *myself, I might pay more attention to fellow foreigners that are active in this field.*

328 **Keywords network**

329 To find the most researched topics focused on grasslands, we mapped the keyword network after  
330 excluding the occasionally used keywords, that is, those who had a degree of less than 10 (Figure  
331 8). Not considering the words that were used to search for the articles that were used for creating  
332 the study database, the keywords most influent and important within the network were  
333 *Biodiversity* and *Conservation* (Figures 8, 9). Also, our results showed that terms such as *Farm*  
334 *management*, *Pastoral value*, *Landscape pattern*, *Ancient trees* are among many other keywords  
335 on the bottom positions, both from the perspective of their use and their importance within the  
336 network (Supplementary Table 1).





341 *Figure 9 – Top 25 keywords used in publications about Romania's grasslands by degree versus a) betweenness and b)*  
342 *eigenvector centralities (blue = keywords used for data collection).*

## 343 **Discussion**

344 We provide a comprehensive analysis of the research network around grasslands in an Eastern  
345 European country, Romania. Grasslands have key socio-cultural, economic and natural values  
346 and can be approached from several disciplinary perspectives (Veen et al. 2009). Thus, research  
347 on grasslands are important contributions to the knowledge because of the several perspectives  
348 within which these systems can be understood, including agronomy, nature conservation,  
349 ecology, sociology, statistics, sociology, anthropology, economics, political sciences, geography.  
350 We found that both national and international researchers and institutions contribute to scientific  
351 knowledge regarding Romanian grasslands, with a higher influence from foreign researchers.  
352 Furthermore, we identified the most commonly addressed and the most influential research  
353 topics regarding Romanian grasslands.

354 *Who is researching Romanian grasslands?*

355 Considering the limited number of articles, our result shows a great international coverage of  
356 institutions and researchers involved in Romanian grassland research (192 institutions, 517  
357 coauthors, 197 articles). By analyzing the co-authorship centrality metrics, we showed that the  
358 contribution of foreign institutions and researchers to grasslands research is high, while there are  
359 also key institutions from Romanian which have an important role as brokers. We are aware of  
360 the fact that a single author can name several host institutions in the research papers, however,  
361 first nominated institution usually is the home institution (Glänzel and Schubert 2004) which  
362 reduce the potential bias. This redundancy (i.e., one author feeling a responsibility to indicate  
363 multiple institutional addresses) also may represent opportunities for innovative knowledge  
364 generation which can flow into the cumulative knowledge pool (Leydesdorff 2004, Newman  
365 2004). For example, one of the authors of the present manuscript (TH) adopted a social-  
366 ecological approach for understanding wood-pasture systems of Romania and Europe; this  
367 approach was adopted as a result of a postdoctoral research period spent at Leuphana University  
368 (Lüneburg, Germany), where the research team addressed a holistic understanding of the  
369 sustainability challenges of cultural landscapes in Romania.

370 We found that a researcher can have an outstanding contribution to the knowledge of Romanian  
371 grasslands not only as ‘grassland specialist’ but also as an ecological modeler, trans-disciplinary  
372 researcher or economist (see also the interviews for the profile of three researchers highlighted  
373 by our analysis), as being part of a larger, interdisciplinary research group. While internationally  
374 visible scientific production sharply increased to a maximum of 42 papers in 2017, relatively few  
375 papers are published in top-tier journals, as in other Eastern European countries (Kozak et al.  
376 2015). The lack of improvement in the publishing performance can be explained by the limited  
377 funding (David and Marko 2018, Miclaus and Micu 2018) as well as by the established traditions  
378 in choosing the target journals (Campos-Arceiz et al. 2015). Inter-disciplinary and international  
379 expertise is an important driver of the knowledge generation (Gazni et al. 2012) for grasslands  
380 management, and researchers of Romania could capitalize on this even more. International  
381 collaborations are increasingly possible and encouraged, e.g., within Horizon 2020 and  
382 Biodiversa-EraNet project partnerships (Granieri and Renda 2012). These collaborations can  
383 allow knowledge flow, the development of new coauthorship networks (Hancean and Perc 2016)  
384 and also can buffer the unstable funding which characterizes Romanian research (Miclaus and  
385 Micu 2018). Our results suggest several ways in which a local researcher can increase its  
386 attractivity for international research projects, including a keen interest in a holistic  
387 understanding of the cultural landscapes (of which grasslands are part), active and long-term  
388 engagement with local stakeholders and partners and increased scientific productivity (Balvanera  
389 et al. 2017). The interviews of the academic stars of the network show, irrespective of the origin  
390 of the author that answered, that the cooperation to investigate Romanian grasslands is made  
391 more by means of recommendations and by common knowledge, the role of foreign authors and  
392 institutions being of defining importance regarding research initiatives and partnerships.

393 *What were the research topics addressing Romanian grasslands?*

394 We identified 577 keywords in internationally visible research addressing Romanian grasslands.  
395 Few keywords have high importance in the overall keyword network; this can be interpreted as  
396 the main topics driving grassland research in Romania. These keywords (Figures 8, 9) are mostly  
397 related to the high natural values of grasslands, ecosystem services and the land-use practices  
398 (including abandonment) related to grasslands. The results can be explained in multiple ways.  
399 First, there was a momentum generated by the accession of Romania to the European Union

400 (2007), where the delineation of Natura 2000 sites and the development of management plans for  
401 them was and are still an ongoing process (Manolache et al. 2017). Second, the establishment of  
402 conservation biology as a research discipline in the academic environment of Romania (besides  
403 the classical ecology research, especially in the 2000s, also resulted in research projects which  
404 targeted rare species and habitats as well as the negative impact of management (especially  
405 overgrazing) on these. Third, several Non-Governmental Organizations also increased the social  
406 awareness about the decline of biodiversity (especially in the protected areas but also beyond)  
407 (Rozyłowicz et al. 2017), this again motivating research targeting the biodiversity and  
408 conservation of grasslands. Within this, the mountain hay meadows have outstanding importance  
409 (this is why ‘Carpathians’ were highlighted as important, Figures 8 and 9), being highly  
410 biodiverse as well as threatened by overgrazing and abandonment (Cremene et al. 2005, Sutcliffe  
411 et al. 2014, Michielsen et al. 2017). A relatively recent overview of the research targeting Natura  
412 2000 sites in the European Union showed that research supporting Natura 2000 network is  
413 dominated by ecological research while the policy and social aspects are underrepresented  
414 (Popescu et al. 2014). Our analysis on Romanian grasslands research suggests a similar pattern.  
415 We identified several research topics which we would expect to be better represented (i.e., more  
416 influential) in the network, because of their crucial importance in the management of the  
417 grasslands. Less important topics from the perspective of network analysis are the economy of  
418 grasslands, the traditional ecological knowledge related to grasslands, stakeholders and the non-  
419 herbaceous elements across the grasslands. From the perspective of holistic understanding  
420 (Hanspach et al. 2014), there are recently established research projects in different regions of  
421 Romania (i.e., ‘Sustainable Landscapes in Central Romania’), which aim to contribute to a  
422 socially and ecologically sustainable farming system in Romania. Romania hosts some of the  
423 most representative wood-pasture systems of Central and Eastern Europe (Roellig et al. 2018).  
424 Despite their common occurrence in Romania and their relative scarcity in Western Europe  
425 (Plieninger et al. 2015), we found a surprisingly low number of papers addressing these systems.  
426 Since wood-pastures of Romania suffered from the lack of tree regeneration (Roellig et al. 2018)  
427 and the erosion of values related to scattered trees (Torralba et al. 2018), it is of utmost  
428 importance to amplify the holistic research on these systems. Based on our collective, long-term  
429 experience as researchers within the Romanian academic system, we believe that Romanian  
430 academia still has much to do for implementing holistic, trans-disciplinary research to address

431 sustainability problems related to farming landscapes in general and pastures in particular. One  
432 major barrier of adopting an integrative approach is the strong tradition of disciplinary research  
433 which still dominates research and teaching at the universities. This is also reflected in the  
434 dominant research themes identified in Figures 8 and 9.

## 435 **Conclusions**

436 Although grasslands are complex social-ecological systems which can be studied in several  
437 scientific domains or interdisciplinary, internationally visible research networks around  
438 Romania's grasslands is still undeveloped (e.g., relatively low number of papers in top-tier, low  
439 number of visible researchers with institutional affiliation from Romania). The co-authorship  
440 network structure reveals several institutional leaders who can further promote the research in  
441 this area. These top institutions are prestigious institutions from Romania closely followed by  
442 foreign collaborators (e.g., from Hungary, Germany). Based on their academic profile, top  
443 researchers are from diverse scientific fields (plant ecology, conservation biology, population  
444 ecology, etc.), a feature favoring the scientific performance by increasing the interdisciplinary  
445 and relevancy of research. The subject of research is mainly related to the biological and  
446 ecological characteristics of grasslands, a notable absence from internationally visible research  
447 being the management of grasslands, especially in the context of EU Common Agricultural  
448 Policies. To increase scientific performance, and better inform EU and local policies on  
449 grassland management, Romanian researchers should better capitalize on international  
450 collaborations and local academic leaders.

## 451 **Acknowledgments**

452 This work was supported by a grant of the Romanian National Authority for Scientific Research  
453 (<https://uefiscdi.ro/>), PN-III-P4-IDPCE-2016-0483. We would like to thank the three network  
454 leaders for their valuable contribution added to our paper through their interview answers.

## 455 **References**

- 456 Abbasi, A., K. S. K. Chung, and L. Hossain. 2012. Egocentric analysis of co-authorship network structure,  
457 position and performance. *Information Processing & Management* **48**:671-679.
- 458 Abson, D. J., J. Fischer, J. Leventon, J. Newig, T. Schomerus, U. Vilsmaier, H. von Wehrden, P. Abernethy,  
459 C. D. Ives, N. W. Jager, and D. J. Lang. 2017. Leverage points for sustainability transformation.  
460 *Ambio* **46**:30-39.

- 461 Azadi, H., P. Keramati, F. Taheri, P. Rafiaani, D. Teklemariam, K. Gebrehiwot, G. Hosseininia, S. Van  
462 Passel, P. Lebailly, and F. Witlox. 2018. Agricultural land conversion: Reviewing drought impacts  
463 and coping strategies. *International Journal of Disaster Risk Reduction* **31**:184-195.
- 464 Babai, D., and Z. Molnár. 2014. Small-scale traditional management of highly species-rich grasslands in  
465 the Carpathians. *Agriculture, Ecosystems & Environment* **182**:123-130.
- 466 Balvanera, P., T. M. Daw, T. A. Gardner, B. Martín-López, A. V. Norström, C. Ifejika Speranza, M.  
467 Spierenburg, E. M. Bennett, M. Farfan, M. Hamann, J. N. Kittinger, T. Luthe, M. Maass, G. D.  
468 Peterson, and G. Perez-Verdin. 2017. Key features for more successful place-based sustainability  
469 research on social-ecological systems: a Programme on Ecosystem Change and Society (PECS)  
470 perspective. *Ecology and Society* **22**.
- 471 Barabási, A. L. 2016. *Network science*. Cambridge University Press.
- 472 Barabási, A. L., H. Jeong, Z. Néda, E. Ravasz, A. Schubert, and T. Vicsek. 2002. Evolution of the social  
473 network of scientific collaborations. *Physica A: Statistical Mechanics and its Applications*  
474 **311**:590-614.
- 475 Baur, B., C. Cremene, G. Groza, L. Rakosy, A. A. Schilekyo, A. Baur, P. Stoll, and A. Erhardt. 2006. Effects  
476 of abandonment of subalpine hay meadows on plant and invertebrate diversity in Transylvania,  
477 Romania. *Biological Conservation* **132**:261-273.
- 478 Benton, T., T. Hartel, and J. Settele. 2011. Food security: A role for Europe. *Nature* **480**:39.
- 479 Borgatti, S., M. Everett, and J. Johnson. 2018. *Analyzing social networks*. 2nd edition. SAGE Publications,  
480 London.
- 481 Borgatti, S. P. 2002. *Netdraw Network Visualisation*. SAGE Publications.
- 482 Borgatti, S. P., M. G. Everett, and L. C. Freeman. 2002. *Ucinet for Windows: Software for Social Network*  
483 *Analysis*. Analytic Technologies, Harvard.
- 484 Bugalho, M. N., M. C. Caldeira, J. S. Pereira, J. Aronson, and J. G. Pausas. 2011. Mediterranean cork oak  
485 savannas require human use to sustain biodiversity and ecosystem services. *Frontiers in Ecology*  
486 *and the Environment* **9**:278-286.
- 487 Campos-Arceiz, A., R. B. Primack, and L. P. Koh. 2015. Reviewer recommendations and editors' decisions  
488 for a conservation journal: Is it just a crapshoot? And do Chinese authors get a fair shot?  
489 *Biological Conservation* **186**:22-27.
- 490 Chen, C., F. Ibekwe-SanJuan, and J. Hou. 2010. The structure and dynamics of cocitation clusters: A  
491 multiple-perspective cocitation analysis. **61**:1386-1409.
- 492 Cobo, M. J., A. G. López-Herrera, E. Herrera-Viedma, and F. Herrera. 2011. Science mapping software  
493 tools: Review, analysis, and cooperative study among tools. **62**:1382-1402.
- 494 Cremene, C., G. Groza, L. Rakosy, A. A. Schilekyo, A. Baur, A. Erhardt, and B. Baur. 2005. Alterations of  
495 Steppe-Like Grasslands in Eastern Europe: a Threat to Regional Biodiversity Hotspots.  
496 *Conservation Biology* **19**:1606-1618.
- 497 David, D., and B. Marko. 2018. Political pressures on Romania's research. *Nature* **560**:167-167.
- 498 Ding, Y., R. Rousseau, and D. Wolfram, editors. 2014. *Measuring Scholarly Impact*. Methods and Practice.  
499 Springer International Publishing.
- 500 Dorresteiijn, I., J. Loos, J. Hanspach, and J. Fischer. 2017. Socioecological drivers facilitating biodiversity  
501 conservation in traditional farming landscapes. *Ecosystem Health and Sustainability* **1**:1-9.
- 502 Dotsika, F., and A. Watkins. 2017. Identifying potentially disruptive trends by means of keyword network  
503 analysis. *Technological Forecasting and Social Change* **119**:114-127.
- 504 Fischer, J., T. Hartel, and T. Kuemmerle. 2012. Conservation policy in traditional farming landscapes.  
505 *Conservation Letters* **5**:167-175.
- 506 Flor, M. 2018. Creating D3 Chord Diagrams. <https://github.com/mattflor/chorddiag>.
- 507 Gazni, A., C. R. Sugimoto, and F. Didegah. 2012. Mapping world scientific collaboration: Authors,  
508 institutions, and countries. **63**:323-335.

- 509 Glänzel, W., and A. Schubert. 2004. Analysing scientific networks through co-authorship. Pages 257-276  
510 Handbook of quantitative science and technology research. Springer.
- 511 Granieri, M., and A. Renda. 2012. Innovation law and policy in the European Union: towards Horizon  
512 2020. Springer Science & Business Media.
- 513 Halada, L., D. Evans, C. Romão, and J.-E. Petersen. 2011. Which habitats of European importance depend  
514 on agricultural practices? *Biodiversity and Conservation* **20**:2365-2378.
- 515 Hancean, M.-G., M. Perc, and L. Vlasceanu. 2014. Fragmented Romanian Sociology: Growth and  
516 Structure of the Collaboration Network. *PLoS One* **9**:e113271.
- 517 Hancean, M. G., and M. Perc. 2016. Homophily in coauthorship networks of East European sociologists.  
518 *Sci Rep* **6**:36152.
- 519 Hanneman, R., and M. Riddle. 2005. Introduction to social network methods. Riverside, CA: University  
520 of California, Riverside.
- 521 Hanspach, J., T. Hartel, A. I. Milcu, F. Mikulcak, I. Dorresteijn, J. Loos, H. von Wehrden, T. Kuemmerle, D.  
522 Abson, A. Kovács-Hostyánszki, A. Báldi, and J. Fischer. 2014. A holistic approach to studying  
523 social-ecological systems and its application to southern Transylvania. *Ecology and Society* **19**.
- 524 Hartel, T., N. Fagerholm, M. Torralba, Á. Balázsi, and T. Plieninger. 2018. Forum: Social-Ecological System  
525 Archetypes for European Rangelands. *Rangeland Ecology & Management* **71**:536-544.
- 526 Kleijn, D., F. Kohler, A. Báldi, P. Batáry, E. D. Concepción, Y. Clough, M. Díaz, D. Gabriel, A. Holzschuh, E.  
527 Knop, A. Kovács, E. J. P. Marshall, T. Tschardt, and J. Verhulst. 2009. On the relationship  
528 between farmland biodiversity and land-use intensity in Europe. *Proceedings of the Royal  
529 Society B: Biological Sciences* **276**:903.
- 530 Kozak, M., L. Bornmann, and L. Leydesdorff. 2015. How have the Eastern European countries of the  
531 former Warsaw Pact developed since 1990? A bibliometric study. *Scientometrics* **102**:1101-  
532 1117.
- 533 Lescourret, F., D. Magda, G. Richard, A.-F. Adam-Blondon, M. Bardy, J. Baudry, I. Doussan, B. Dumont, F.  
534 Lefèvre, I. Litrico, R. Martin-Clouaire, B. Montuelle, S. Pellerin, M. Plantegenest, E. Tancoigne, A.  
535 Thomas, H. Guyomard, and J.-F. Soussana. 2015. A social-ecological approach to managing  
536 multiple agro-ecosystem services. *Current Opinion in Environmental Sustainability* **14**:68-75.
- 537 Leydesdorff, L. 2004. Clusters and maps of science journals based on bi-connected graphs in *Journal  
538 Citation Reports*. *Journal of Documentation* **60**:371-427.
- 539 Lomba, A., C. Guerra, J. Alonso, J. P. Honrado, R. Jongman, and D. McCracken. 2014. Mapping and  
540 monitoring High Nature Value farmlands: challenges in European landscapes. *J Environ Manage*  
541 **143**:140-150.
- 542 Manolache, S., C. M. Ciocanea, L. Rozyłowicz, and A. J. E. J. G. Nita. 2017. Natura 2000 in Romania—a  
543 decade of governance challenges. **8**:24-34.
- 544 Michielsen, M., L. Szemák, A. Fenesi, I. Nijs, and E. Ruprecht. 2017. Resprouting of woody species  
545 encroaching temperate European grasslands after cutting and burning. *Applied Vegetation  
546 Science* **20**:388-396.
- 547 Miclaus, M., and O. Micu. 2018. Reform Romania's grant-review system. *Nature* **558**:189-189.
- 548 Newman, M. E. J. 2004. Coauthorship networks and patterns of scientific collaboration. **101**:5200-5205.
- 549 Pătru-Stupariu, I., M.-S. Stupariu, I. Stoicescu, A. Peringer, A. Buttler, and C. Fürst. 2017. Integrating geo-  
550 biodiversity features in the analysis of landscape patterns. *Ecological Indicators* **80**:363-375.
- 551 Pe'er, G., L. V. Dicks, i. P. Viscont, R. Arlettaz, A. Báldi, T. G. Benton, S. Collins, M. Dieterich, R. D.  
552 Gregory, F. Hartig, K. Henle, P. R. Hobson, D. Kleijn, R. K. Neumann, T. Robijns, J. Schmidt, A.  
553 Schwartz, W. J. Sutherland, A. Turbé, F. Wulf, and A. V. Scott. 2014. EU agricultural reform fails on  
554 biodiversity. *Science* **344**:1090-1092.

- 555 Peringer, A., A. Buttler, F. Gillet, I. Pătru-Stupariu, K. A. Schulze, M.-S. Stupariu, and G. Rosenthal. 2017.  
556 Disturbance-grazer-vegetation interactions maintain habitat diversity in mountain pasture-  
557 woodlands. *Ecological Modelling* **359**:301-310.
- 558 Petrescu-Mag, R. M., D. C. Petrescu, and I. V. Petrescu-Mag. 2017. Whereto land fragmentation–land  
559 grabbing in Romania? The place of negotiation in reaching win–win community-based solutions.  
560 *Land Use Policy* **64**:174-185.
- 561 Plieninger, T., and C. Bieling. 2013. Resilience-Based Perspectives to Guiding High-Nature-Value  
562 Farmland through Socioeconomic Change. *Ecology and Society* **18**.
- 563 Plieninger, T., T. Hartel, B. Martín-López, G. Beaufoy, E. Bergmeier, K. Kirby, M. J. Montero, G. Moreno,  
564 E. Oteros-Rozas, and J. Van Uytvanck. 2015. Wood-pastures of Europe: Geographic coverage,  
565 social–ecological values, conservation management, and policy implications. *Biological*  
566 *Conservation* **190**:70-79.
- 567 Popescu, V. D., L. Rozyłowicz, I. M. Niculae, A. L. Cucu, and T. Hartel. 2014. Species, habitats, society: an  
568 evaluation of research supporting EU's Natura 2000 network. *PLoS One* **9**:e113648.
- 569 Queiroz, C., R. Beilin, C. Folke, and R. Lindborg. 2014. Farmland abandonment: threat or opportunity for  
570 biodiversity conservation? A global review. *Frontiers in Ecology and the Environment* **12**:288-  
571 296.
- 572 Roellig, M., A. Costa, M. Garbarino, J. Hanspach, T. Hartel, S. Jakobsson, R. Lindborg, S. Mayr, T.  
573 Plieninger, M. Sammul, A. Varga, and J. Fischer. 2018. Post Hoc Assessment of Stand Structure  
574 Across European Wood-Pastures: Implications for Land Use Policy. *Rangeland Ecology &*  
575 *Management* **71**:526-535.
- 576 Rozyłowicz, L., A. Nita, S. Manolache, C. M. Ciocanea, and V. D. Popescu. 2017. Recipe for success: A  
577 network perspective of partnership in nature conservation. *Journal for Nature Conservation*  
578 **38**:21-29.
- 579 Ruprecht, E. 2006. Successfully Recovered Grassland: A Promising Example from Romanian Old-Fields.  
580 *Restoration Ecology* **14**:473-480.
- 581 Stoate, C., A. Baldi, P. Beja, N. D. Boatman, I. Herzon, A. van Doorn, G. R. de Snoo, L. Rakosy, and C.  
582 Ramwell. 2009. Ecological impacts of early 21st century agricultural change in Europe--a review.  
583 *J Environ Manage* **91**:22-46.
- 584 Sutcliffe, L. M. E., P. Batáry, U. Kormann, A. Báldi, L. V. Dicks, I. Herzon, D. Kleijn, P. Tryjanowski, I.  
585 Apostolova, R. Arlettaz, A. Aunins, S. Aviron, L. Baležentienė, C. Fischer, L. Halada, T. Hartel, A.  
586 Helm, I. Hristov, S. D. Jelaska, M. Kaligarič, J. Kamp, S. Klimek, P. Koorberg, J. Kostiuková, A.  
587 Kovács-Hostyánszki, T. Kuemmerle, C. Leuschner, R. Lindborg, J. Loos, S. Maccherini, R. Marja, O.  
588 Máthé, I. Paulini, V. Proença, J. Rey-Benayas, F. X. Sans, C. Seifert, J. Stalenga, J. Timaeus, P.  
589 Török, C. Swaay, E. Viik, and T. Tschardtke. 2014. Harnessing the biodiversity value of Central  
590 and Eastern European farmland. *Diversity and Distributions* **21**:722-730.
- 591 Torralba, M., N. Fagerholm, T. Hartel, G. Moreno, and T. Plieninger. 2018. A social-ecological analysis of  
592 ecosystem services supply and trade-offs in European wood-pastures. *Science Advances* **4**.
- 593 Veen, P., R. Jefferson, J. de Smidt, and J. van der Straaten. 2009. *Grasslands in Europe: Of High Nature*  
594 *Value*. BRILL.
- 595 Wang, J. 2016. Knowledge creation in collaboration networks: Effects of tie configuration. *Research*  
596 *Policy* **45**:68-80.
- 597 Wilson, J. B., R. K. Peet, J. Dengler, and M. Pärtel. 2012. Plant species richness: the world records.  
598 *Journal of Vegetation Science* **23**:796-802.

599
